# Supplementary material
Source: PubMed Central journal article supplement (PMC3367135)
Supplement: NIHMS365632-supplement-01.pdf [file NIHMS365632-supplement-01.pdf]

**Table S1.** List of Primers used for the generation and sequencing of heterodimeric constructs.

| <b>Primer</b>                                  | <b>Sequence (5' to 3')</b>                                                                                                                                                                                                 |
|------------------------------------------------|----------------------------------------------------------------------------------------------------------------------------------------------------------------------------------------------------------------------------|
| <b>H111N</b>                                   | GTCTATCTG <u>AAC</u> ATCTTCCG                                                                                                                                                                                              |
| <b>G158W</b>                                   | CCAGATGTCCTTCTGG <u>TGG</u> GCCACCGTGATCACCG                                                                                                                                                                               |
| <b>H198N</b>                                   | TTCTCGCTG <u>AAC</u> TACCTGCT                                                                                                                                                                                              |
| <b>Linker</b>                                  | CGGCACGAAAACGGTCGTGGCAGAG <u>GCGTCGATCGCCGGCGGCCGCTA</u><br>AGTCGACGGGAAAGGACAGTGAC (Linker H1 for pCT)<br>GACGAAACCACCATCCAGCTCGGGT <u>GCGGCCGCACCGCATCGGGCCCGTCCG</u><br>GAATCCCTCACGACCATTACG (Linker H2 for pNT)       |
| <b>Strep-tag</b>                               | CGTGGCAGAGATTGAGGGGCGCGGGT <u>TGGAGCCACCCGCAGTTCGAGAA</u><br><u>A</u> TAAGTCGACGGGAAAGGACAGTGAC                                                                                                                            |
| <b>Sequencing-<br/><i>fbcB</i><sub>1</sub></b> | CCACGGATCGCACTACGAC (forward)(upstream of <i>fbcB</i> <sub>1</sub> )<br>GGCCGCCGCGCATCGACG (reverse)(within linker)                                                                                                        |
| <b>Sequencing-<br/><i>fbcB</i><sub>2</sub></b> | GTCGATCGCCGGCGGCCGCA (forward)(within linker)<br>TTTCTCGAACTGCGGGTGGC (reverse) (in strep tag)                                                                                                                             |
| <b>Unbiased<br/>size check*</b>                | GTGTCCAACGCAGAAGATCA (forward)(in <i>fbcF</i> , upstream<br>of <i>fbcB</i> or <i>fbcB</i> <sub>1</sub> )<br>TGCGCAGACCTCGGTATAGACCTG (reverse)(in <i>fbcC</i> ,<br>downstream of <i>fbcB</i> or <i>fbcB</i> <sub>2</sub> ) |

\*The sequence of these primers are unbiased with respect to selection of *cyt b* encoding spans of heterodimeric or homodimeric constructs.

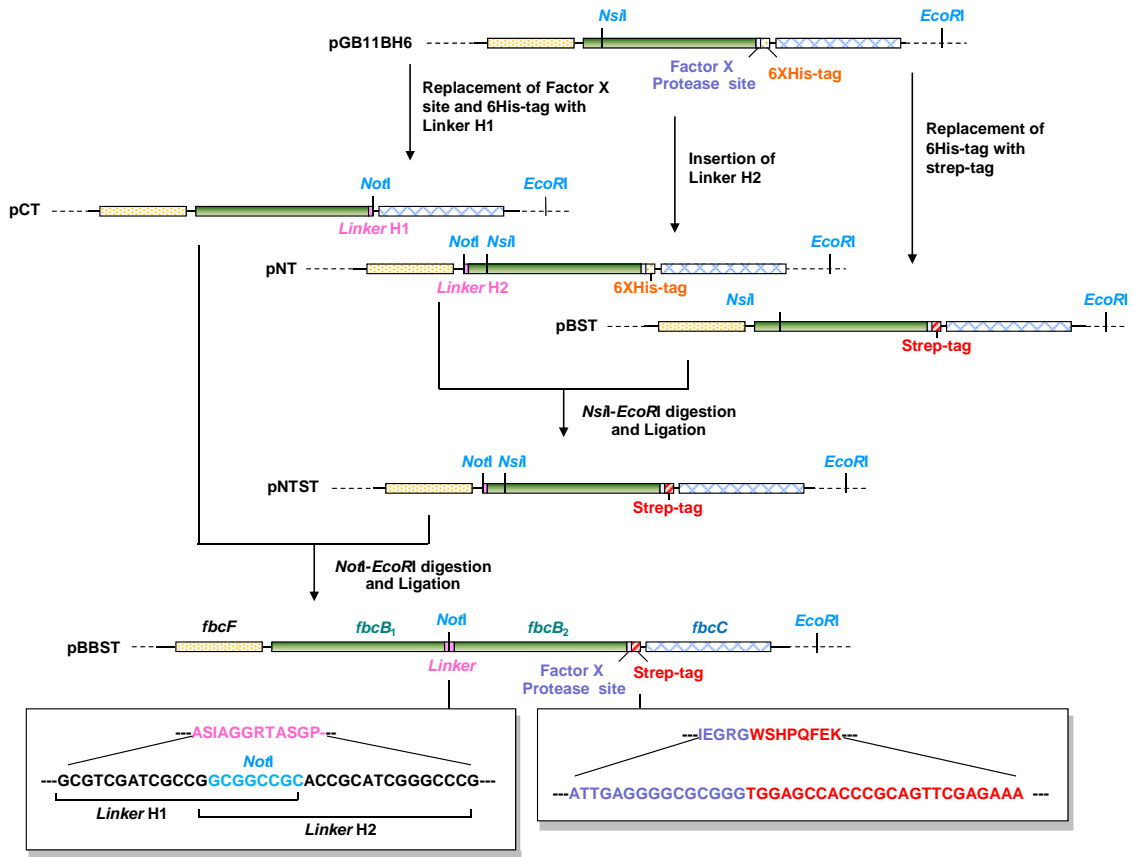

**Fig. S1.** Schematic showing construction of heterodimeric expression system of *fbc* operon in *R. sphaeroides*.
